# Supplementary material
Source: Research Square preprint supplement (doi:10.21203/rs.3.rs-9312722/v1)
Supplement: Supplementary file 1 [file 3a43722c0d98f0aae09d2a90.pdf]

### Atlantic salmon (*Salmo salar*)

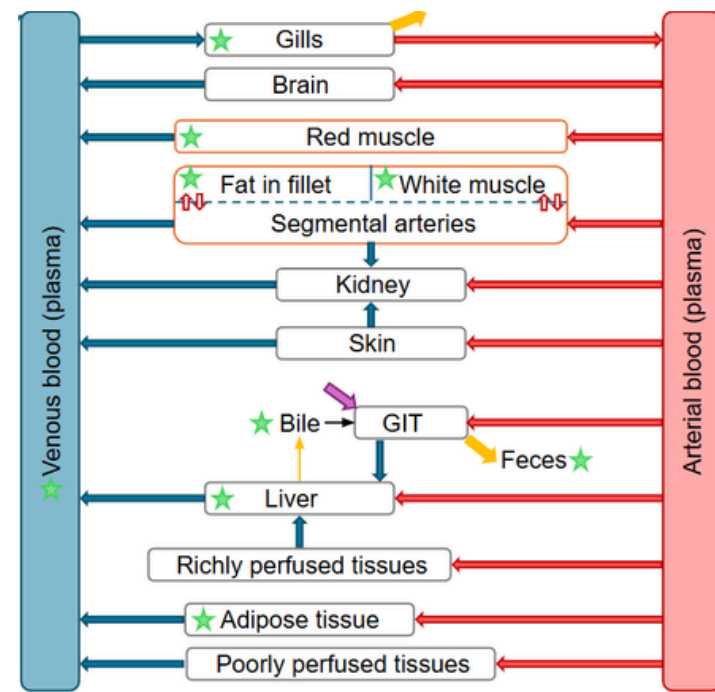

Growth, T°C, O<sub>2</sub>,  
Cardiac output

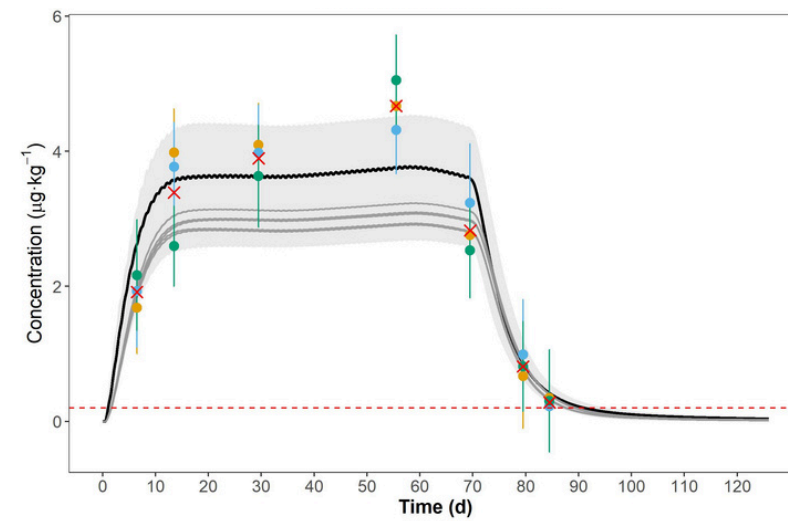

Predicted bioaccumulation of six PFAS in 10  
tissues (★), including fillet

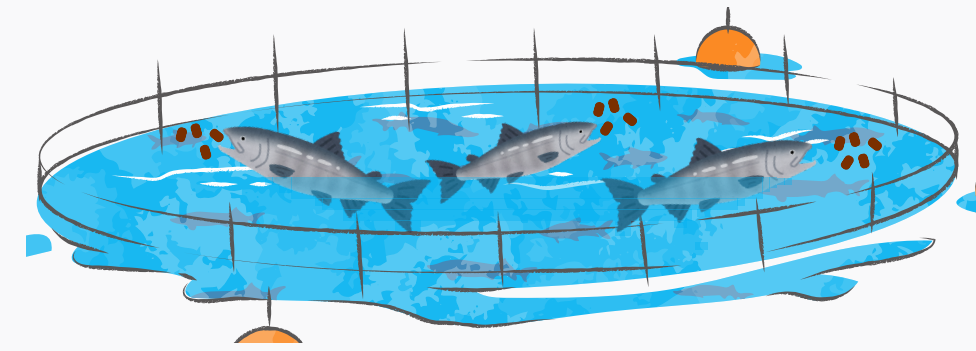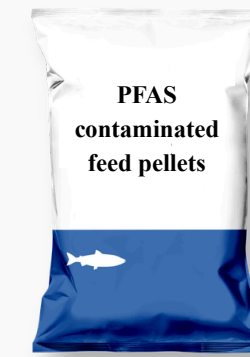

**PFAS maximum levels**

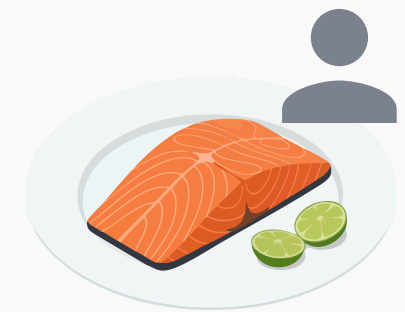

**Acceptable PFAS  
levels in food**
